# Supplementary material for: Non-rhythmic head-direction cells in the parahippocampal region are not constrained by attractor network dynamics
Source: eLife journal article supplement (doi:10.7554/elife.35949), 2018-09-17

**a**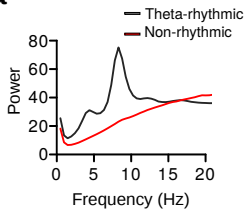**b**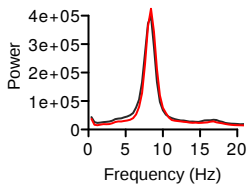**c****HD x GCs on same tetraode 1****HD cell**  
7 Hz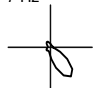**Grid cell**  
16 Hz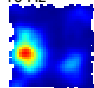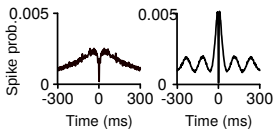**HD x GCs on same tetraode 2****HD cell**  
14 Hz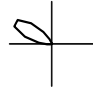**Grid cell 1**  
23 Hz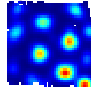**Grid cell 2**  
18 Hz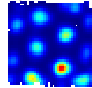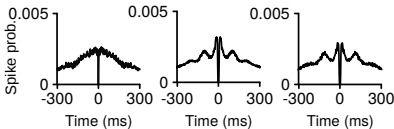**HD x GCs on same tetraode 3****HD cell**  
9 Hz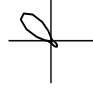**Grid cell**  
5 Hz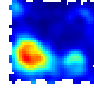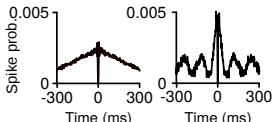**HD x GCs on same tetraode 4****HD cell**  
7 Hz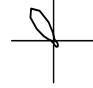**Grid cell 1**  
16 Hz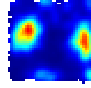**Grid cell 2**  
27 Hz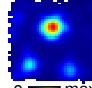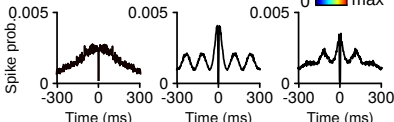

Supplement: supp [file elife-35949-supp-v1.zip]
