# Supplementary material for: Non-rhythmic head-direction cells in the parahippocampal region are not constrained by attractor network dynamics
Source: PubMed Central journal article supplement (PMC6158010; doi:10.7554/elife.35949), 2018-09-17
Supplement: elife-35949-supp1.pdf [file elife-35949-supp1.pdf]

| Mouse        | Hemisphere | Tetrode tips |             |          |             |          |             |          | Cells       |                    |                  |               |              |
|--------------|------------|--------------|-------------|----------|-------------|----------|-------------|----------|-------------|--------------------|------------------|---------------|--------------|
|              |            | MEC          | PaS/<br>MEC | PaS      | PrS/<br>PaS | PrS      | PrS/<br>RSA | Cortex   | HD<br>cells | Theta-<br>rhythmic | Non-<br>rhythmic | Grid<br>cells | All<br>cells |
| jp757        | left       | 1            | 0           | 0        | 2           | 0        | 0           | 0        | 11          | 4                  | 7                | 9             | 65           |
| jp757        | right      | 1            | 0           | 0        | 0           | 0        | 0           | 0        | 8           | 1                  | 7                | 19            | 61           |
| jp759        | left       | 4            | 0           | 0        | 0           | 0        | 0           | 0        | 0           | 0                  | 0                | 13            | 27           |
| jp759        | right      | 2            | 0           | 0        | 0           | 0        | 0           | 0        | 10          | 3                  | 7                | 31            | 92           |
| jp865        | left       | 0            | 0           | 0        | 0           | 2        | 1           | 0        | 0           | 0                  | 0                | 11            | 46           |
| jp865        | right      | 3            | 0           | 0        | 0           | 0        | 0           | 1        | 7           | 7                  | 0                | 2             | 39           |
| jp2097       | left       | 0            | 0           | 4        | 0           | 0        | 0           | 0        | 2           | 2                  | 0                | 1             | 30           |
| jp2097       | right      | 2            | 0           | 0        | 0           | 0        | 0           | 0        | 17          | 16                 | 1                | 8             | 64           |
| jp2158       | left       | 0            | 0           | 2        | 0           | 0        | 0           | 0        | 0           | 0                  | 0                | 0             | 47           |
| jp2158       | right      | 4            | 0           | 0        | 0           | 0        | 0           | 0        | 2           | 2                  | 0                | 23            | 93           |
| jp2159       | left       | 3            | 0           | 0        | 0           | 0        | 0           | 0        | 4           | 3                  | 1                | 30            | 113          |
| jp2159       | right      | 2            | 0           | 0        | 0           | 0        | 0           | 0        | 8           | 2                  | 6                | 33            | 84           |
| jp3302       | left       | 0            | 0           | 1        | 0           | 0        | 2           | 0        | 0           | 0                  | 0                | 0             | 3            |
| jp3302       | right      | 2            | 0           | 0        | 0           | 0        | 0           | 0        | 8           | 7                  | 1                | 0             | 22           |
| jp4506       | left       | 2            | 2           | 0        | 0           | 0        | 0           | 0        | 6           | 5                  | 1                | 20            | 82           |
| jp4506       | right      | 4            | 0           | 0        | 0           | 0        | 0           | 0        | 9           | 7                  | 2                | 11            | 52           |
| jp4688       | left       | 0            | 0           | 2        | 1           | 0        | 0           | 0        | 0           | 0                  | 0                | 7             | 10           |
| jp4688       | right      | 4            | 0           | 0        | 0           | 0        | 0           | 0        | 1           | 0                  | 1                | 1             | 14           |
| <b>Total</b> |            | <b>34</b>    | <b>2</b>    | <b>9</b> | <b>3</b>    | <b>2</b> | <b>3</b>    | <b>1</b> | <b>93</b>   | <b>59</b>          | <b>34</b>        | <b>219</b>    | <b>944</b>   |
