# Supplementary material for: Non-rhythmic head-direction cells in the parahippocampal region are not constrained by attractor network dynamics
Source: eLife journal article supplement (doi:10.7554/elife.35949), 2018-09-17
Supplement: supp [file elife-35949-supp-v1.zip]

**jp757 left**  
**N = 11 HD cells**  
 (4 theta-rhythmic,  
 7 non-rhythmic)

**jp759 right**  
**N = 10 HD cells**  
 (3 theta-rhythmic,  
 7 non-rhythmic)

**jp2159 left,**  
**N = 4 HD cells**  
 (3 theta-rhythmic,  
 1 non-rhythmic)

**jp2159 right**  
**N = 8 HD cells**  
 (2 theta-rhythmic,  
 6 non-rhythmic)

**jp4506 right,**  
**N = 9 HD cells**  
 (7 theta-rhythmic,  
 2 non-rhythmic)

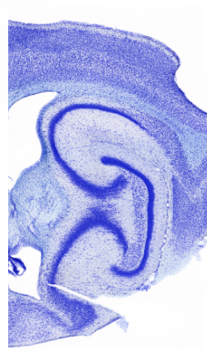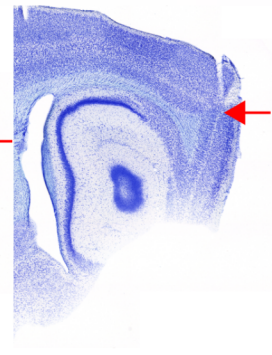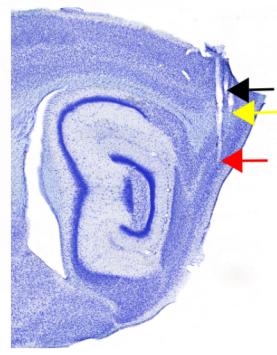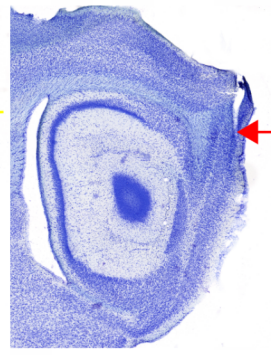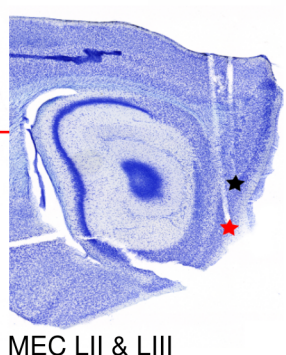

MEC LII & LIII

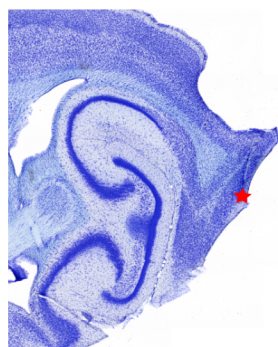

MEC LII

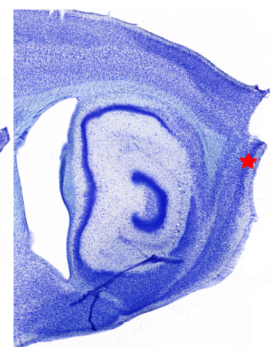

MEC LII

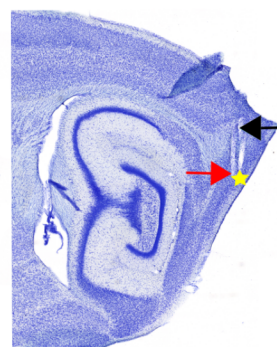

MEC LIII

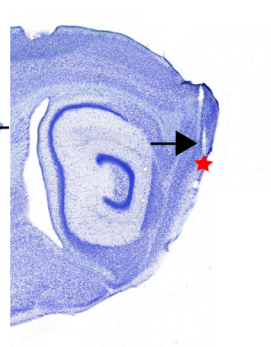

MEC LII

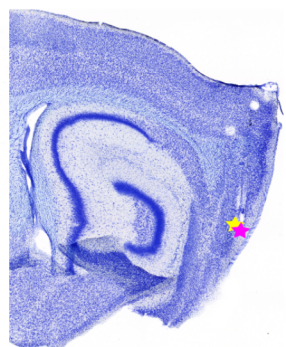

MEC LII

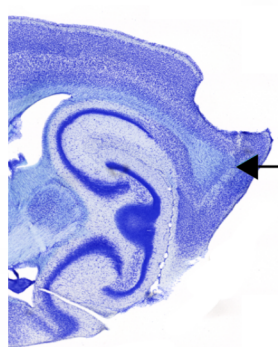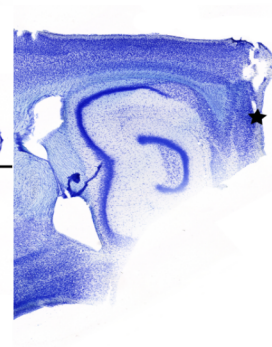

MEC LII

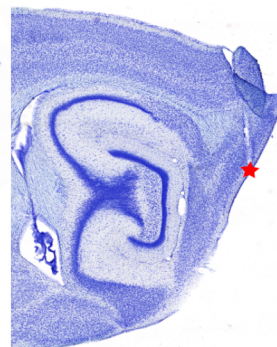

MEC LII

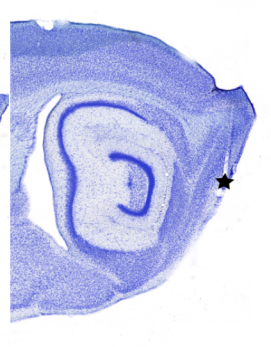

MEC LII

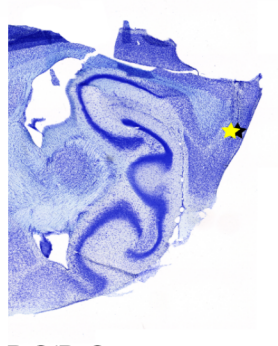

PrS/PaS

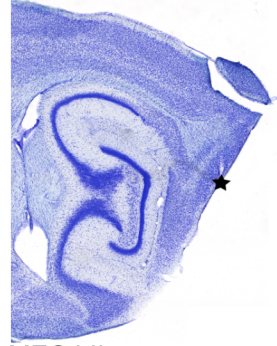

MEC LII
