# Supplementary material for: Non-rhythmic head-direction cells in the parahippocampal region are not constrained by attractor network dynamics
Source: eLife journal article supplement (doi:10.7554/elife.35949), 2018-09-17
Supplement: supp [file elife-35949-supp-v2.zip]

Archive with 11 entries (11 files):
- elife_poa_e35949_Figure_4_figure_supplement_1.pdf
- elife_poa_e35949_Figure_3_figure_supplement_2.pdf
- elife_poa_e35949_Transparent_Reporting_File.pdf
- elife_poa_e35949_Figure_6_figure_supplement_1.pdf
- elife_poa_e35949_Figure_4_figure_supplement_2.pdf
- elife_poa_e35949_Supplementary_File_1.tex
- elife_poa_e35949_Figure_8_figure_supplement_1.pdf
- elife_poa_e35949_Figure_5_figure_supplement_1.pdf
- elife_poa_e35949_Figure_1_figure_supplement_1.pdf
- elife_poa_e35949_Figure_1_figure_supplement_2.pdf
- elife_poa_e35949_Figure_3_figure_supplement_1.pdf
