# Supplementary material for: Non-rhythmic head-direction cells in the parahippocampal region are not constrained by attractor network dynamics
Source: eLife journal article supplement (doi:10.7554/elife.35949), 2018-09-17
Supplement: supp [file elife-35949-supp-v2.zip › elife_poa_e35949_Supplementary_File_1.tex]

\documentclass[10pt,]{article}
\usepackage{lmodern}
\usepackage{amssymb,amsmath}
\usepackage{ifxetex,ifluatex}
\usepackage{setspace}
\usepackage{mathtools}
\usepackage{multirow}
\usepackage{amssymb}
\usepackage{gensymb}
\usepackage{graphicx}
\usepackage[utf8]{inputenc}
\usepackage{float}
\usepackage{multirow}


\newcommand{\sups}[1]{\ensuremath{^{\textrm{#1}}}}
\newcommand{\subs}[1]{\ensuremath{_{\textrm{#1}}}}
\renewcommand{\rmdefault}{phv} % Arial
\renewcommand{\sfdefault}{phv} % Arial


\usepackage[margin=1in]{geometry}
\usepackage{graphicx}
\usepackage{tabularx}
\renewcommand\tabularxcolumn[1]{>{\Centering}m{#1}}
\newcolumntype{P}[1]{>{\centering\arraybackslash}m{#1}} 

\begin{document}
	
 
\def\arraystretch{1.5}% 
	\hspace{-1.8cm}
\begin{tabularx}{1.161\linewidth}{|P{1cm} |P{1.85cm} | P{.65cm}   P{.65cm}  P{.65cm } P{.65cm} P{.65cm} P{.65cm} P{.95cm} || P{1cm} P{1.2cm} P{1.2cm} P{1cm} P{1cm}|}
		\hline
		 & & \multicolumn{7}{ c|| }{\textbf{Tetrode tips}} & & & \textbf{Cells} & & \\ %\cline{4-10} \\
	\hline
	\vspace{.3cm}
	\textbf{Mouse} & 
	\vspace{.3cm} \textbf{Hemisphere} & 
	\vspace{.3cm} \textbf{MEC} & 
	\vspace{.3cm} \textbf{PaS/
		MEC} & 
	\vspace{.3cm} \textbf{PaS} & 
	\vspace{.3cm} \textbf{PrS/ PaS} &  
	\vspace{.3cm} \textbf{PrS} & 
	\vspace{.3cm} \textbf{PrS/ RSA} & 
	\vspace{.3cm} \textbf{Cortex} & 
	\vspace{.3cm} \textbf{HD cells} & 
	\vspace{.3cm} \textbf{Theta-rhythmic} & 
	\vspace{.3cm} \textbf{Non-rhythmic} & 
	\vspace{.3cm} \textbf{Grid cells} &
	\vspace{.3cm} \textbf{All cells} \\ [.075cm] 
	\hline %\\ %[.125cm]
	\vspace{.1cm}
	jp757 & left & 1 & 0 & 0 & 2 & 0 & 0 & 0 & 11 & 4 & 7 & 9 & 65\\
	jp757 & right & 1 & 0 & 0 & 0 & 0 & 0 & 0 & 8 & 1 & 7 & 19 & 61\\
	\hline
	jp759 & left & 4 & 0 & 0 & 0 & 0 & 0 & 0 & 0 & 0 & 0 & 13 & 27\\
	jp759 & right & 2 & 0 & 0 & 0 & 0 & 0 & 0 & 10 & 3 & 7 & 31 & 92\\
	\hline
	jp865 & left & 0 & 0 & 0 & 0 & 2 & 1 & 0 & 0 & 0 & 0 & 11 & 46\\
	jp865 & right & 3 & 0 & 0 & 0 & 0 & 0 & 1 & 7 & 7 & 0 & 2 & 39\\ 
	\hline
	jp2097 & left & 0 & 0 & 4 & 0 & 0 & 0 & 0 & 2 & 2 & 0 & 1 & 30\\
	jp2097 & right & 2 & 0 & 0 & 0 & 0 & 0 & 0 & 17 & 16 & 1 & 8 & 64\\
	\hline
	jp2158 & left & 0 & 0 & 2 & 0 & 0 & 0 & 0 & 0 & 0 & 0 & 0 & 47\\
	jp2158 & right & 4 & 0 & 0 & 0 & 0 & 0 & 0 & 2 & 2 & 0 & 23 & 93\\
	\hline
	jp2159 & left & 3 & 0 & 0 & 0 & 0 & 0 & 0 & 4 & 3 & 1 & 30 & 113\\
	jp2159 & right & 2 & 0 & 0 & 0 & 0 & 0 & 0 & 8 & 2 & 6 & 33 & 84\\ 
	\hline
	jp3302 & left & 0 & 0 & 1 & 0 & 0 & 2 & 0 & 0 & 0 & 0 & 0 & 3\\
	jp3302 & right & 2 & 0 & 0 & 0 & 0 & 0 & 0 & 8 & 7 & 1 & 0 & 22\\ 
	\hline
	jp4506 & left & 2 & 2 & 0 & 0 & 0 & 0 & 0 & 6 & 5 & 1 & 20 & 82\\
	jp4506 & right & 4 & 0 & 0 & 0 & 0 & 0 & 0 & 9 & 7 & 2 & 11 & 52\\
	\hline
	jp4688 & left & 0 & 0 & 2 & 1 & 0 & 0 & 0 & 0 & 0 & 0 & 7 & 10\\
	jp4688 & right & 4 & 0 & 0 & 0 & 0 & 0 & 0 & 1 & 0 & 1 & 1 & 14\\
	\hline %\\[.25cm]
	\vspace{.3cm}
	\textbf{Total} & \vspace{.3cm}  & 
	\vspace{.3cm} \textbf{34} & \vspace{.3cm} \textbf{2} &
	\vspace{.3cm}  \textbf{9} & \vspace{.3cm}  \textbf{3} & 
	\vspace{.3cm}  \textbf{2} & \vspace{.3cm} \textbf{3} &  
	\vspace{.3cm} \textbf{1} & \vspace{.3cm} \textbf{93} & 
	\vspace{.3cm} \textbf{59} & \vspace{.3cm} \textbf{34} & \vspace{.3cm} \textbf{219} & \vspace{.3cm} \textbf{944}\\
	\hline
\end{tabularx}
\end{document}
