# Supplementary figures and images for: Non-rhythmic head-direction cells in the parahippocampal region are not constrained by attractor network dynamics
Source: eLife journal article supplement (doi:10.7554/elife.35949), 2018-09-17

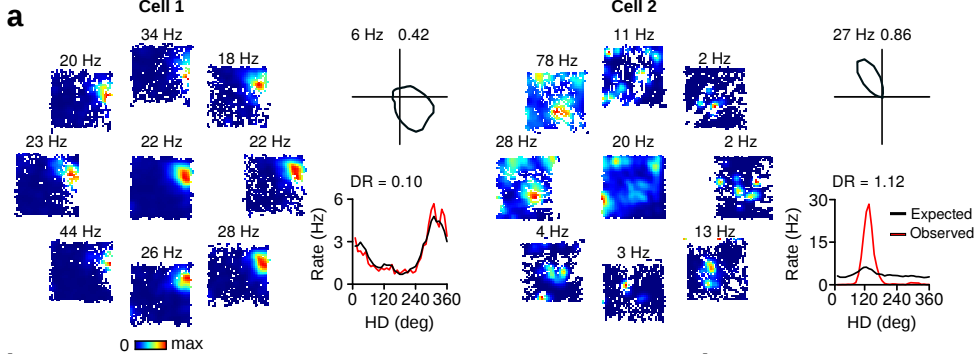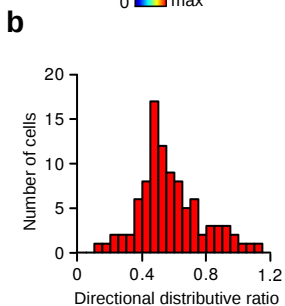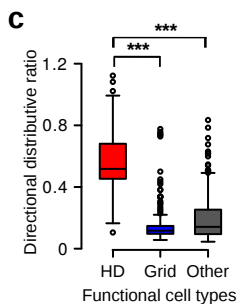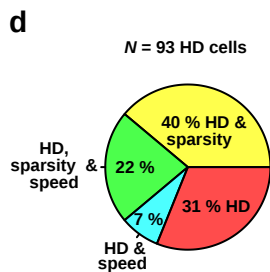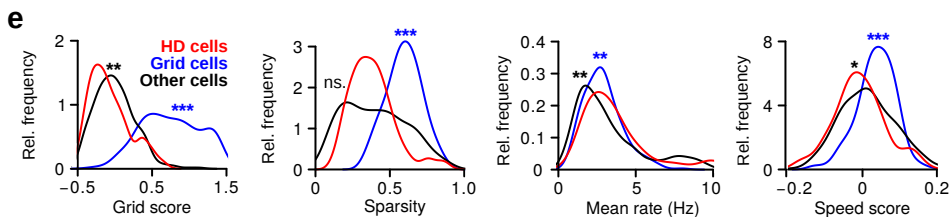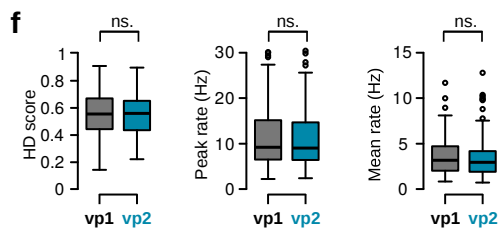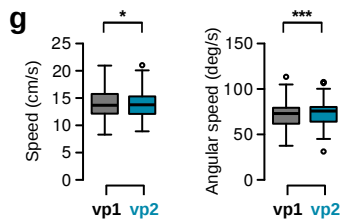

Supplement: supp [file elife-35949-supp-v1.zip]

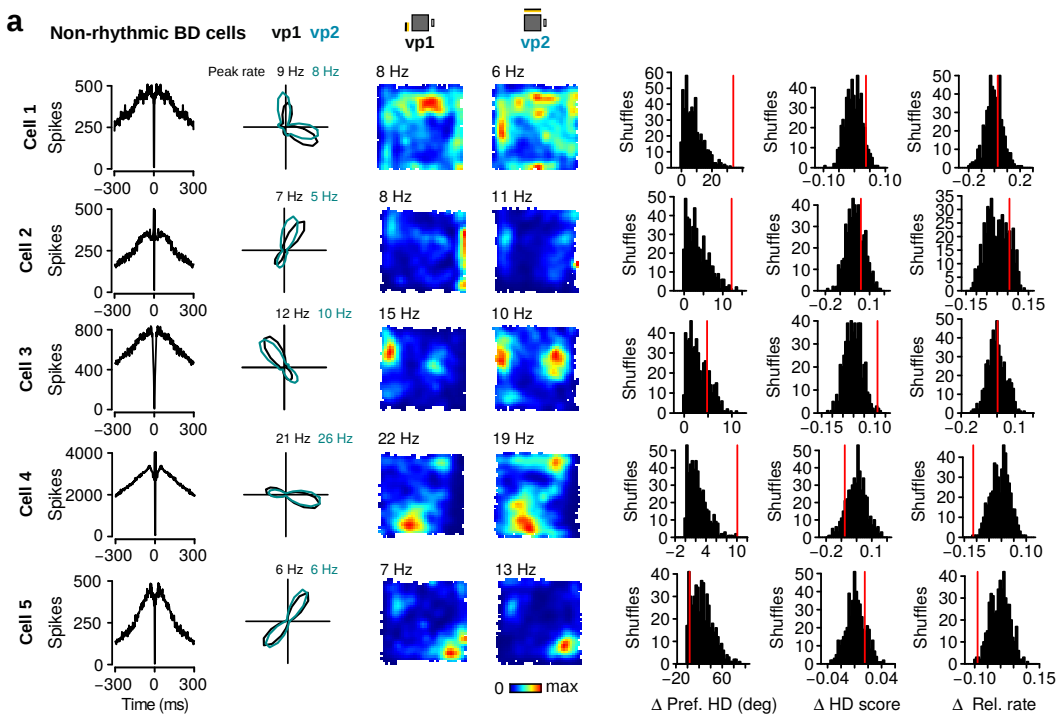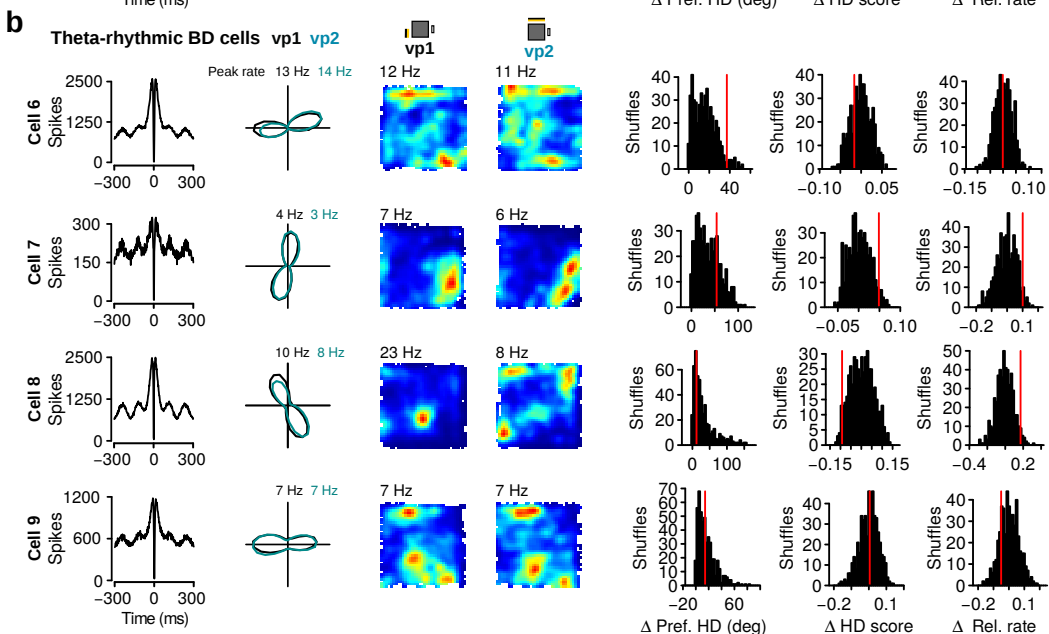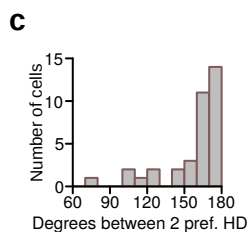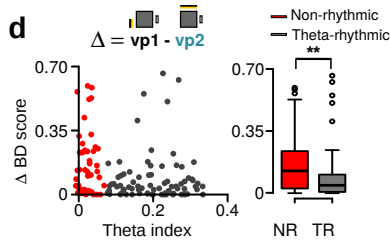

Supplement: supp [file elife-35949-supp-v1.zip]

**a****Allocentric HD tuning**

vp1

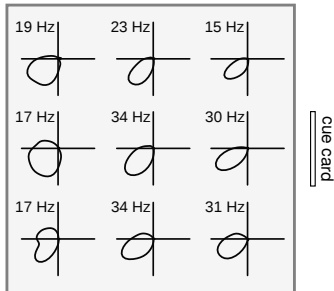**b****Egocentric landmark bearing tuning**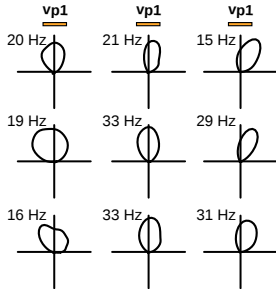**c**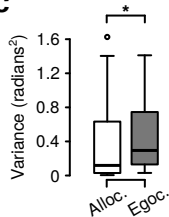

Supplement: supp [file elife-35949-supp-v1.zip]

**a**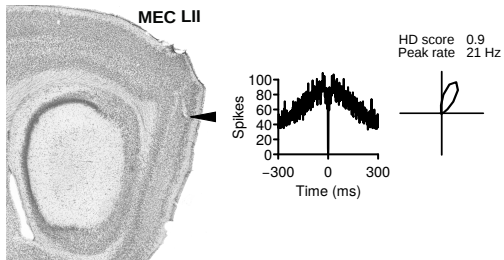**b**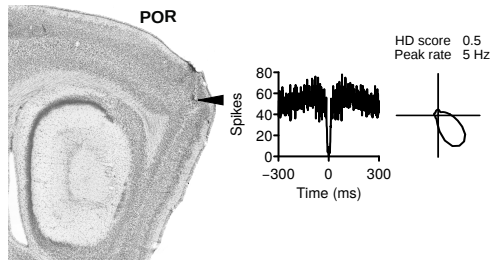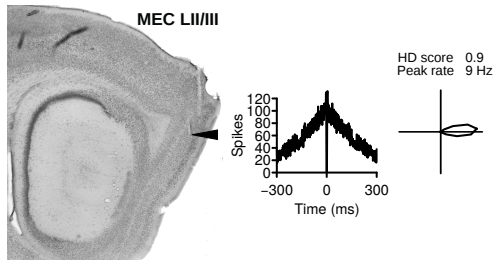

Supplement: supp [file elife-35949-supp-v1.zip]

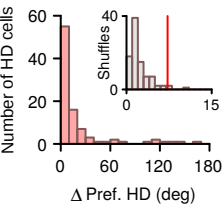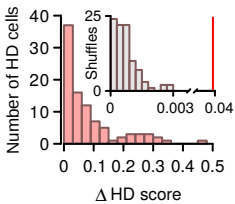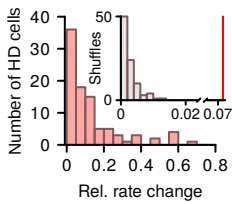

Supplement: supp [file elife-35949-supp-v1.zip]

**a**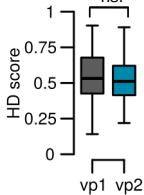**b**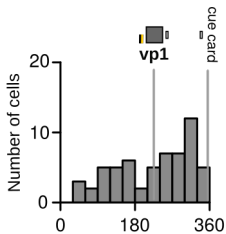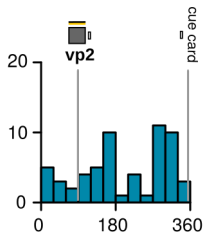**c**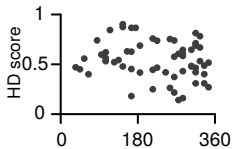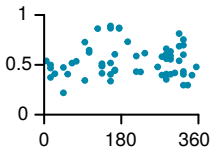**d**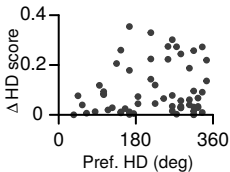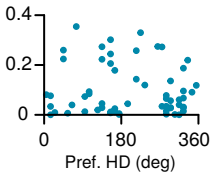

Supplement: supp [file elife-35949-supp-v1.zip]

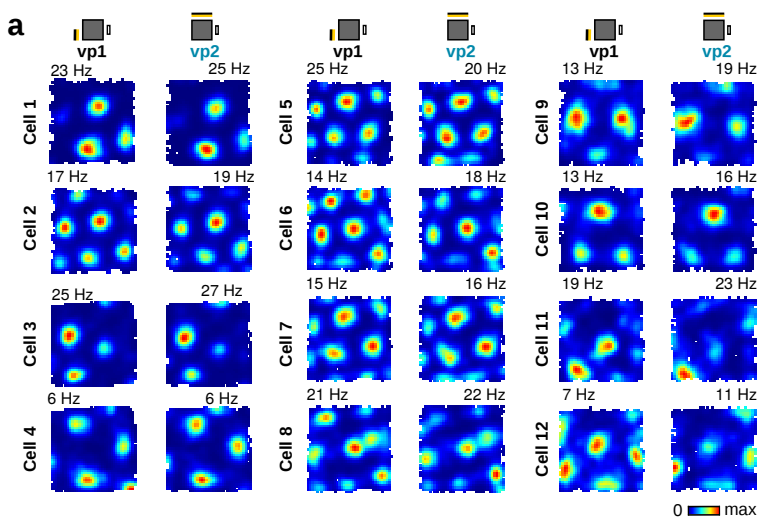

**b**

Pairs containing changing grid cells  $N = 106$

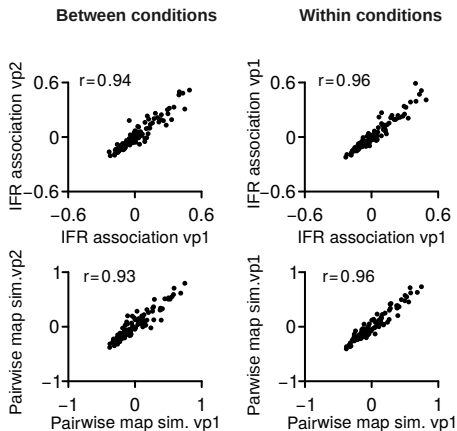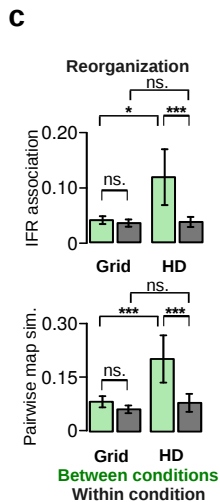

Supplement: supp [file elife-35949-supp-v1.zip]
